# Supplementary material
Source: publisher figshare collection journal article supplement (https://sage.figshare.com/ndownloader/files/18109790)

**APPENDIX C**

Peer-Reviewed Publications on Multiple Jobholding by Year between 1960 and 2019


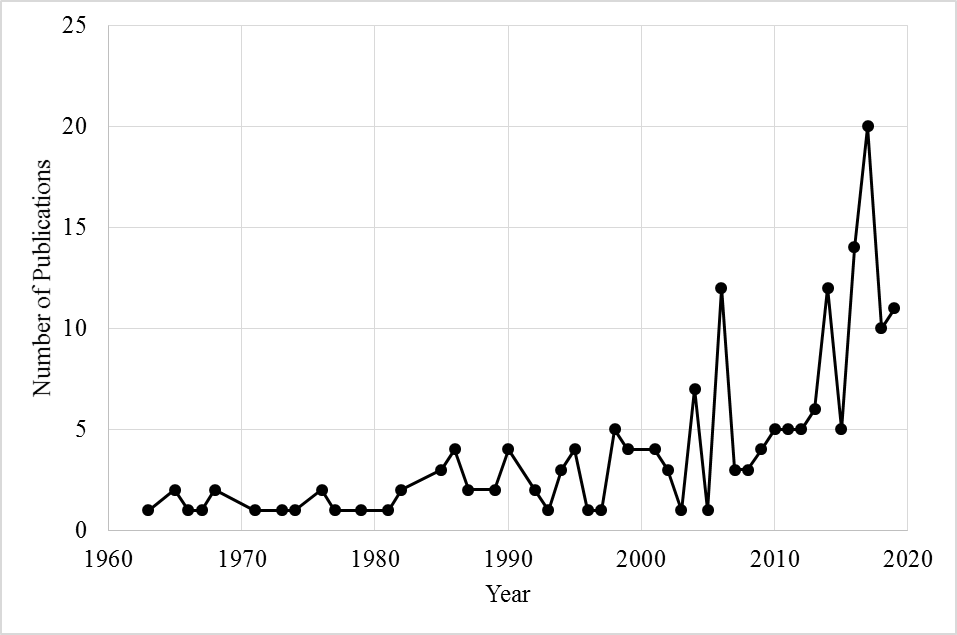

Supplement: Supplementary file 1 [file 18109790]
